# Supplementary material for: Chemical and Sensory Characterization of Xinomavro Red Wine Using Grapes from Protected Designations of Northern Greece
Source: MDPI journal article supplement (doi:10.3390/molecules28135016), 2023-06-27
Supplement: s1 [file s1]

**Table S1.** Mean score of sensory attributes ( $\pm$  standard deviation) of Xinomavro red wines from six vineyards (Xin1–Xin6) in the Amyndeon PDO zone. Values with different lower case letters in the same row are significantly different according to the post-hoc test ( $\alpha = 0.05$ ).

|                   | Xin1             | Xin2             | Xin3             | Xin4             | Xin5             | Xin6             | <i>p</i> -Value |
|-------------------|------------------|------------------|------------------|------------------|------------------|------------------|-----------------|
| Aroma intensity   | 5.9 $\pm$ 0.5 bc | 5.8 $\pm$ 0.4 bc | 5.6 $\pm$ 0.4 c  | 6.6 $\pm$ 0.6 a  | 6.2 $\pm$ 0.6 ab | 5.8 $\pm$ 0.3 bc | <0.0001         |
| Cherry            | 2.7 $\pm$ 0.5 cd | 2.3 $\pm$ 0.2 d  | 5.5 $\pm$ 0.7 a  | 2.6 $\pm$ 0.4 cd | 4.1 $\pm$ 0.9 b  | 3.0 $\pm$ 0.8 c  | <0.0001         |
| Vanilla           | 0.1 $\pm$ 0.2 bc | 0.0 $\pm$ 0.0 c  | 0.0 $\pm$ 0.0 c  | 0.4 $\pm$ 0.4 a  | 0.2 $\pm$ 0.2 b  | 0.2 $\pm$ 0.2 bc | <0.0001         |
| Olive             | 1.1 $\pm$ 0.2 c  | 0.0 $\pm$ 0.0 d  | 3.0 $\pm$ 0.4 a  | 2.9 $\pm$ 1.1 ab | 2.3 $\pm$ 0.9 b  | 1.4 $\pm$ 0.7 c  | <0.0001         |
| Sour cherry       | 1.4 $\pm$ 0.4 bc | 2.2 $\pm$ 0.8 a  | 1.6 $\pm$ 0.5 b  | 1.0 $\pm$ 0.4 c  | 1.0 $\pm$ 0.7 c  | 1.5 $\pm$ 0.5 bc | <0.0001         |
| Tomato            | 3.0 $\pm$ 1.0 b  | 2.0 $\pm$ 0.8 c  | 2.5 $\pm$ 0.4 bc | 3.9 $\pm$ 0.8 a  | 4.5 $\pm$ 0.9 a  | 4.6 $\pm$ 1.2 a  | <0.0001         |
| Strawberry        | 6.3 $\pm$ 0.5 a  | 5.5 $\pm$ 0.9 b  | 4.1 $\pm$ 0.2 c  | 4.2 $\pm$ 0.2 c  | 5.4 $\pm$ 0.2 b  | 5.1 $\pm$ 0.2 b  | <0.0001         |
| Berry fruit       | 6.6 $\pm$ 0.5 a  | 5.9 $\pm$ 0.9 b  | 5.4 $\pm$ 0.8 b  | 4.1 $\pm$ 1.0 c  | 5.7 $\pm$ 0.9 b  | 4.2 $\pm$ 0.6 c  | <0.0001         |
| Mushroom          | 0.1 $\pm$ 0.2 d  | 1.9 $\pm$ 0.2 a  | 1.2 $\pm$ 0.9 b  | 0.1 $\pm$ 0.1 cd | 0.1 $\pm$ 0.1 d  | 0.7 $\pm$ 0.5 bc | <0.0001         |
| Green bell pepper | 5.0 $\pm$ 0.5 b  | 4.6 $\pm$ 0.6 b  | 4.6 $\pm$ 0.4 b  | 5.0 $\pm$ 0.7 b  | 4.7 $\pm$ 0.4 b  | 5.7 $\pm$ 0.7 a  | <0.0001         |
| Plum              | 1.1 $\pm$ 0.2 b  | 1.8 $\pm$ 0.6 a  | 1.4 $\pm$ 0.5 ab | 1.0 $\pm$ 0.6 b  | 1.0 $\pm$ 0.6 b  | 1.1 $\pm$ 0.4 b  | <0.0001         |
| Spices            | 5.1 $\pm$ 0.4 b  | 5.9 $\pm$ 0.5 a  | 6.1 $\pm$ 0.8 a  | 6.0 $\pm$ 0.5 a  | 5.0 $\pm$ 0.7 b  | 5.6 $\pm$ 0.4 ab | <0.0001         |

**Table S2.** Mean values ( $\pm$  standard deviation,  $n = 3$ ) of enological parameters of Xinomavro musts at technological maturity from six vineyards (Xin1–Xin6) in the Amyndeon PDO zone.

|                                         | Xin1            | Xin2            | Xin3            | Xin4            | Xin5            | Xin6            |
|-----------------------------------------|-----------------|-----------------|-----------------|-----------------|-----------------|-----------------|
| Brix                                    | 22.5 $\pm$ 0.1  | 22.1 $\pm$ 0.0  | 23.1 $\pm$ 0.1  | 23.5 $\pm$ 0.1  | 22.7 $\pm$ 0.1  | 23.3 $\pm$ 0.2  |
| pH                                      | 3.19 $\pm$ 0.02 | 3.13 $\pm$ 0.01 | 3.11 $\pm$ 0.01 | 3.16 $\pm$ 0.02 | 3.18 $\pm$ 0.00 | 3.17 $\pm$ 0.00 |
| Titrateable acidity (tartaric acid g/L) | 8.6 $\pm$ 0.0   | 9.4 $\pm$ 0.1   | 9.1 $\pm$ 0.2   | 9.2 $\pm$ 0.3   | 9.2 $\pm$ 0.2   | 8.8 $\pm$ 0.0   |

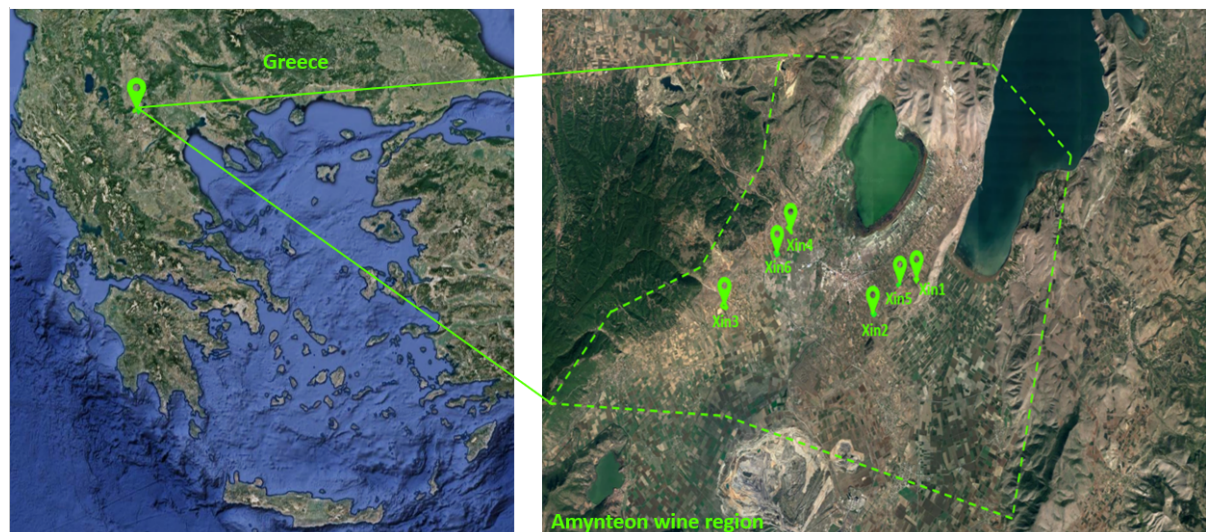

**Figure S1.** Location of the study area (Amyndeon PDO wine region) and vineyards with their codes (Xin1–Xin6).
